# Supplementary material for: Probing the average distribution of water in organic hydrate crystal structures with radial distribution functions (RDFs)
Source: Royal Society of Chemistry journal article supplement (doi:10.1039/c6ce02119k), 2016-12-19
Supplement: c6ce02119k15.xlsx [file c6ce02119k15.xlsx]

## Sheet: Sheet1
r	0	0.050167	0.10033	0.1505	0.20067	0.25084	0.301	0.35117	0.40134	0.45151	0.50167	0.55184	0.60201	0.65217	0.70234	0.75251	0.80268	0.85284	0.90301	0.95318	1.0033	1.0535	1.1037	1.1538	1.204	1.2542	1.3043	1.3545	1.4047	1.4548	1.505	1.5552	1.6054	1.6555	1.7057	1.7559	1.806	1.8562	1.9064	1.9565	2.0067	2.0569	2.107	2.1572	2.2074	2.2575	2.3077	2.3579	2.408
Carbon
C_OW	0	0	0	0	0	0	0	0	0	0	0	0	0	0	0	0	0	0	0	0	0	0	0	0	0	0	0	0	0	0	0	0	0	0	0	0	0	0	0	0	0	0	0	0	0	0.245479	0.284398	0.230902	0.219636
C_HW	0	0	0	0	0	0	0	0	0	0	0	0	0	0	0	0	0	0	0	0	0	0	0	0	0	0	0	0	0	0	0.336138	0	0.304072	0.29715	0.242182	0.234143	0	0.306015	0.234215	0.274036	0.252442	0.273824	0.277393	0.233365	0.298221	0.264564	0.341571	0.366443	0.463381
CA_OW	0	0	0	0	0	0	0	0	0	0	0	0	0	0	0	0	0	0	0	0	0	0	0	0	0	0.235062	0	0.220154	0.339087	0.269426	0.252386	0.245331	0.208973	0.239774	0.28755	0.257712	0.269254	0.212755	0.252159	0.262108	0.277612	0.340366	0.287692	0.230974	0.286611	0.259525	0.270868	0.275793	0.284452
CA_HW	0	0	0	0	0	0	0	0	0	0	0	0	0	0	0	0	0	0.319009	0.267903	0.276475	0.301141	0.206532	0.255092	0.252353	0.230882	0.308144	0.258278	0.242095	0.277041	0.269541	0.29786	0.226514	0.263027	0.257244	0.275778	0.247441	0.245116	0.264214	0.259668	0.24847	0.282392	0.285034	0.255641	0.270449	0.261314	0.296852	0.305363	0.269107	0.27729
CB_OW	0	0	0	0	0	0	0	0	0	0	0	0	0	0	0	0	0	0	0	0	0	0	0	0	0	0	0	0	0	0	0	0	0	0	0	0	0	0	0	0	0	0	0	0	0.296513	0.378543	0	0	0
CB_HW	0	0	0	0	0	0	0	0	0	0	0	0	0	0	0	0	0	0	0	0	0	0	0	0	0	0	0	0	0	0	0	0	0	0	0	0.26593	0	0	0	0.198693	0.210124	0	0.256509	0.23158	0	0.19449	0.131059	0.209133	0.376543
CC_OW	0	0	0	0	0	0	0	0	0	0	0	0	0	0	0	0	0	0	0	0	0	0	0	0	0	0	0	0	0	0	0	0	0	0	0.578773	0.49112	0.413136	0	0	0	0	0.316793	0.718005	0	0	0.262932	0.313756	0.480637	0
CC_HW	0	0	0	0	0	0	0	0	0	0	0	0	0	0	0	0	0	0	0	0	0	0.685306	0	0	0	0	0	0	0	0	0.441293	0	0	0.303577	0	0	0.432549	0.192172	0	0.259602	0.369207	0.370699	0	0.478388	0.321335	0	0.386469	0.22201	0.312676
CD_OW	0	0	0	0	0	0	0	0	0	0	0	0	0	0	0	0	0	0	0	0	0	0	0	0	0	0	0	0	0	0	0	0	0	0	0	0	0	0	0	0	0	0	0.402235	0	0.332151	0.360434	0	0	0.19539
CD_HW	0	0	0	0	0	0	0	0	0	0	0	0	0	0	0	0	0	0	0	0	0	0	0	0	0	0	0.323282	0.339497	0	0.247047	0	0.338294	0.297924	0	0	0.200297	0.197136	0.214748	0.176315	0.186953	0.256716	0.2907	0.227482	0.269274	0.186472	0.27988	0.138198	0.308735	0.199057
CK_OW	0	0	0	0	0	0	0	0	0	0	0	0	0	0	0	0	0	0	0	0	0	0	0	0	0	0	0	0	0	0	0	0	0.779348	0	0	0	0	0.738807	0.599921	0	1.39689	0	0.818067	0.428166	0	0.675915	0.543372	0.292634	0
CK_HW	0	0	0	0	0	0	0	0	0	0	0	0	0	0	0	0	0	0	0	0	0	0	0	0	0	0	0	0	0	0	0.580034	0.651122	0.474767	0.319216	0.329838	0.70678	0.294303	0.479922	0.55037	0.409464	0.517636	0.451343	0.567768	0.22357	0.213404	0.544882	0.715227	0.638088	0.31384
CM_OW	0	0	0	0	0	0	0	0	0	0	0	0	0	0	0	0	0	0	0	0	0	0	0	0	0	0	0	0	0	0	0	0	0	0	0	0	0	0	0	0	0	0	0	0.342109	0	0	0	0	0.294024
CM_HW	0	0	0	0	0	0	0	0	0	0	0	0	0	0	0	0	0	0	0	0	0	0	0	0	0	0	0	0	0	0	0	0.31556	0	0.307782	0.24781	0.324506	0.368521	0	0.238044	0.19148	0.22446	0.317119	0.221729	0.273729	0.234065	0.208478	0.233849	0.278676	0.228721
CN_OW	0	0	0	0	0	0	0	0	0	0	0	0	0	0	0	0	0	0	0	0	0	0	0	0	0	0	0	0	0	0	0	0	0	0	0	0	0	0	0	0	0	0	0	0	0	0	0	0	0.436827
CN_HW	0	0	0	0	0	0	0	0	0	0	0	0	0	0	0	0	0	0	0	0	0	0	0	0	0	0	0	0	0.849846	0	0	0	0	0	0	0	0	0	0	0	0.566424	0	0	0.311363	0	0.406526	0	0.334407	0.24976
CQ_OW	0	0	0	0	0	0	0	0	0	0	0	0	0	0	0	0	0	0	0	0	0	0	0	0	0	0	0	0	0	0	0	0	0	0	0	0	0	0	0.826755	0	0	0	0.422769	0	0.537624	0	0	0	0
CQ_HW	0	0	0	0	0	0	0	0	0	0	0	0	0	0	0	0	0	0	0	0	0	0	0	0	0	0	0	0	0	0	0.581353	0.388454	0	0	0.386401	0	0	0	0	0.341996	0.416904	0.352496	0.252292	0.320113	0	0.292565	0.174559	0	0.449362
CR_OW	0	0	0	0	0	0	0	0	0	0	0	0	0	0	0	0	0	0	0	0	0	0	0	0	0	0	0	0.809193	0	0	1.66876	0	0	0	0	0.5835	0	0	0	0.512187	0.647496	0.808365	0	0	0.400411	0.511183	0	0.584024	0.448655
CR_HW	0	0	0	0	0	0	0	0	0	0	0	0	0	0	0	0	0	0	0	0	0	0	0	0	0	0	0	0	0	0	0	0	0	0	0.350848	0.381684	0.288969	0.318283	0.624586	0.225218	0.427075	0.664745	0.387671	0.419219	0.384149	0.735634	0.526698	0.630343	0.215217
CS_OW	0	0	0	0	0	0	0	0	0	0	0	0	0	0	0	0	0	0	0	0	0	0	0	0	0	0	0	0	0	0	0	0	0	0	0	0	0.755916	0.515417	0.41316	0	0	0	0	0.409411	0	0.320725	0	0	0.258036
CS_HW	0	0	0	0	0	0	0	0	0	0	0	0	0	0	0	0	0	0	0	0	0	0	0	0	0	0	0	0	0.624275	0	0.331546	0.451127	0.343626	0.34834	0.373953	0.330541	0.333666	0.354388	0	0.248234	0.285793	0.383782	0.167863	0.435656	0.27723	0.30526	0.354763	0.254745	0.291218
CT_OW	0	0	0	0	0	0	0	0	0	0	0	0	0	0	0	0	0	0	0	0	0	0	0	0	0	0	0	0	0	0.203056	0.206611	0.204167	0	0.218605	0.19519	0.229774	0.148994	0.164425	0.228699	0.270479	0.253204	0.205338	0.185642	0.194886	0.241563	0.167223	0.244044	0.222527	0.269357
CT_HW	0	0	0	0	0	0	0	0	0	0	0	0	0	0	0	0	0	0	0	0	0	0.252165	0.186344	0.193801	0.205367	0.17345	0.205323	0.174744	0.250765	0.218659	0.220777	0.191207	0.19799	0.198128	0.175617	0.207233	0.187248	0.216787	0.195237	0.192722	0.198616	0.223307	0.220316	0.224753	0.240735	0.233009	0.260161	0.223861	0.244968
CV_OW	0	0	0	0	0	0	0	0	0	0	0	0	0	0	0	0	0	0	0	0	0	0	0	0	0	0	0	0	0	0	0	0	0	1.27761	0	0	0	0	0	0.455224	0.431614	0	0	0.426096	0	1.02225	0	0	0.72631
CV_HW	0	0	0	0	0	0	0	0	0	0	0	0	0	0	0	0	0	0	0	0	0	0	0	0	0	0	0	0	0	0.867769	0.754455	0	0.567123	0	0	0.315194	0.410146	0	0.266784	0.31702	0.631213	0.257318	0.600259	0.3635	0	0.189839	0.634297	0.303646	0.2291
CW_OW	0	0	0	0	0	0	0	0	0	0	0	0	0	0	0	0	0	0	0	0	0	0	0	0	0	0	0	0	0	0	0	0	0	0	0	0	0	0	0	0	0.61372	0	0	0	0.506031	0	0	0.442847	0.486001
CW_HW	0	0	0	0	0	0	0	0	0	0	0	0	0	0	0	0	0	0	0	0	0	0	0	0	0	0	0	0.563878	0	0	0	0	0	0	0	0.332678	0	0	0	0.44614	0.211501	0	0	0	0.383656	0.300555	0.286921	0.457843	0
CZ_OW	0	0	0	0	0	0	0	0	0	0	0	0	0	0	0	0	0	0	0	0	0	0	0	0	0	0	0	0	0	0	0	0	0	0	0	0	0	0	0	0	0	0	0	0.341023	0	0	0.297538	0.256383	0.273551
CZ_HW	0	0	0	0	0	0	0	0	0	0	0	0	0	0	0	0	0	0	0	0	0	0	0	0	0	0	0	0	0	0	0	0	0.248742	0	0	0	0	0.226445	0	0.222473	0	0.167201	0.287209	0.197392	0	0.305301	0.503417	0.139522	0.292316
Av C OW	0	0	0	0	0	0	0	0	0	0	0	0	0	0	0	0	0	0	0	0	0	0	0	0	0	0.0156708	0	0.0686231	0.0226058	0.0314988	0.14185	0.0299665	0.0658881	0.115733	0.0707675	0.10414	0.10582	0.10876	0.154713	0.0999999	0.241369	0.111391	0.188961	0.158178	0.173394	0.280281	0.130265	0.185717	0.259483
Av C HW	0	0	0	0	0	0	0	0	0	0	0	0	0	0	0	0	0	0.0212672	0.0178602	0.0184317	0.0200761	0.0762669	0.0294291	0.0297436	0.0290833	0.0321063	0.0524589	0.0880142	0.133462	0.106868	0.23623	0.170819	0.179818	0.135429	0.158828	0.236428	0.183844	0.171532	0.169681	0.250833	0.323367	0.269171	0.248142	0.28349	0.186705	0.303856	0.332837	0.309104	0.27623
Hydrogen
H_OW	0	0	0	0	0	0	0	0	0	0	0	0	0	0	0	0	0	0	0	0	0	0	0	0	0	0	0	0	0	0	0	0	0	0.68134	0.92736	1.90879	2.6999	3.35949	4.63494	3.87438	3.45735	3.03543	2.48454	1.98559	1.61384	1.08043	1.02198	0.698259	0.664005
H_HW	0	0	0	0	0	0	0	0	0	0	0	0	0	0	0	0	0	0	0	0	0	0	0	0	0	0	0	0	0.338553	0.280428	0.31072	0.27009	0.255616	0.267853	0.313439	0.359854	0.439484	0.470595	0.365842	0.47234	0.5506	0.687122	0.761533	0.878366	0.982585	1.27621	1.74656	1.77734	2.29122
H1_OW	0	0	0	0	0	0	0	0	0	0	0	0	0	0	0	0	0	0	0	0	0	0	0	0	0	0	0	0.251163	0.244432	0.278252	0.229965	0.224239	0.174329	0.175359	0.235749	0.185227	0.230577	0.249511	0.284614	0.286616	0.301099	0.236776	0.277266	0.28169	0.279635	0.329535	0.349813	0.401591	0.384881
H1_HW	0	0	0	0	0	0	0	0	0	0	0	0	0	0	0	0	0	0	0	0	0.220421	0.23659	0.215084	0.308306	0.22656	0.269169	0.18386	0.166372	0.245425	0.261678	0.24471	0.216448	0.244668	0.242885	0.265807	0.304912	0.31491	0.337733	0.260439	0.336647	0.280417	0.311692	0.365908	0.395914	0.422576	0.457859	0.560372	0.644967	0.764332
H2_OW	0	0	0	0	0	0	0	0	0	0	0	0	0	0	0	0	0	0	0	0	0	0	1.19395	0	0	0	0	0.71114	0	0	0	0	0	0	0	0.463724	0	0	0.67286	0.408664	0.657013	0	0.42818	0.378358	0	0.398997	0.215842	0.571334	0.653691
H2_HW	0	0	0	0	0	0	0	0	0	0	0	0	0	0	0	0	0	0	0.670605	0	0	0	0	0	0	0	0.434953	0	0.33931	0.332385	0.648734	0.593076	0.517207	0.377311	0.285824	0.301824	0.265233	0.173357	0.218973	0.338267	0.222039	0.664898	0.418035	0.369393	0.671286	0.590808	0.396664	0.450985	0.860434
H4_OW	0	0	0	0	0	0	0	0	0	0	0	0	0	0	0	0	0	0	0	0	0	0	0	0	0	0	0	0	0	0	0	0	0	0	0	0	0.573928	0	0.42594	0	0	0	0.419979	0	0.349016	0.940362	0.897705	0.916312	1.07771
H4_HW	0	0	0	0	0	0	0	0	0	0	0	0	0	0	0	0	0	0	0	0	0	0	0	0	0	0	0	0.344091	0	0.40055	0.321057	0.340924	0.441366	0.436952	0.356617	0.310855	0.330205	0.317412	0.214785	0.413472	0.280711	0.39131	0.298745	0.568578	0.53075	0.512007	0.809771	0.639096	0.77132
H5_OW	0	0	0	0	0	0	0	0	0	0	0	0	0	0	0	0	0	0	0	0	0	0	0	0	0	0	0	0	0	0	0.832778	0	0	0	0.645765	0	0	0.418447	0	0	0.571685	0.543786	0.61624	0.586422	1.23735	1.41041	1.15793	1.57272	1.06459
H5_HW	0	0	0	0	0	0	0	0	0	0	0	0	0	0	0	0	0	0	0	0	0	0	0	0	0	0	0	0	0	0.402094	0.312133	0.437984	0	0	0.484077	0.387945	0.388733	0.468945	0.270415	0	0.208916	0.414001	0.363478	0.69178	0.617257	0.769693	0.603568	0.854245	0.627291
HA_OW	0	0	0	0	0	0	0	0	0	0	0	0	0	0	0	0	0	0	0	0	0	0	0	0	0	0	0.31282	0.281346	0.268436	0.250436	0.287442	0.294222	0.301402	0.25792	0.321417	0.263451	0.276702	0.32518	0.29388	0.237713	0.311356	0.351415	0.310048	0.378341	0.386042	0.539311	0.534985	0.639632	0.739798
HA_HW	0	0	0	0	0	0	0	0	0	0	0	0	0	0	0	0	0	0	0	0	0.280184	0.251045	0.264062	0.257136	0.268415	0.261466	0.255288	0.225988	0.243279	0.268917	0.26954	0.313072	0.27944	0.290336	0.268839	0.291565	0.344562	0.312208	0.30321	0.317128	0.347626	0.374253	0.400782	0.431115	0.494918	0.526824	0.593908	0.717433	0.781868
HC_OW	0	0	0	0	0	0	0	0	0	0	0	0	0	0	0	0	0	0	0	0	0	0	0.28292	0	0.246702	0	0.312808	0.219234	0.199968	0.250426	0.227014	0.260695	0.229294	0.240393	0.235523	0.254109	0.219898	0.264875	0.190861	0.217359	0.303016	0.249189	0.286156	0.301729	0.276487	0.275763	0.279049	0.321989	0.340054
HC_HW	0	0	0	0	0	0	0	0	0	0	0	0	0	0	0	0	0.271402	0.232227	0.282458	0	0.204964	0.156678	0.19567	0.225102	0.234855	0.207201	0.251102	0.254785	0.232185	0.230564	0.207896	0.228085	0.254714	0.254908	0.237666	0.217375	0.293502	0.219678	0.245949	0.239205	0.277104	0.285884	0.298362	0.334744	0.362757	0.425081	0.43343	0.498957	0.635692
HO_OW	0	0	0	0	0	0	0	0	0	0	0	0	0	0	0	0	0	0	0	0	0	0	0	0	0	0	0	0	0	0	0.992894	1.41205	3.3065	4.59666	6.47673	8.20577	8.19268	5.42959	3.49972	2.59686	1.38076	0.783044	0.621588	0.588279	0.431944	0.481525	0.400459	0.294308	0.414847
HO_HW	0	0	0	0	0	0	0	0	0	0	0	0	0	0	0	0	0	0	0	0	0	0	0.588683	0	0	0	0.41494	0	0.318187	0.363995	0.450995	0.42189	0.41861	0.502743	0.441614	0.522267	0.455535	0.488126	0.488908	0.555794	0.80055	0.978051	1.37337	1.95562	2.93553	3.79934	4.37011	4.52853	4.14631
HP_OW	0	0	0	0	0	0	0	0	0	0	0	0	0	0	0	0	0	0	0	0	0.933219	0	0	0	0	0	0	0	0	0	0	0	0.208295	0	0.552527	0	0.223025	0.365703	0.566914	0.359288	0.293341	0.486044	0.472425	0.294261	0.312088	0.470642	0.656109	0.621348	0.734351
HP_HW	0	0	0	0	0	0	0	0	0	0	0	0	0	0	0	0	0	0	0	0	0	0	0	0	0	0	0	0	0	0	0	0.150379	0.289376	0.181595	0.229626	0.222685	0.263427	0.414499	0.287961	0.348406	0.302022	0.359103	0.48834	0.256814	0.396886	0.607275	0.633077	0.902376	0.879601
Av H OW	0	0	0	0	0	0	0	0	0	0	0	0	0	0	0	0	0	0	0	0	0.103691	0	0.164096	0	0.0274113	0	0.0695142	0.162543	0.079204	0.0865682	0.285566	0.243468	0.468868	0.661297	1.0439	1.25345	1.37963	1.15698	1.17441	0.886764	0.808402	0.631742	0.65738	0.532742	0.542934	0.658553	0.612652	0.670832	0.67488
Av H HW	0	0	0	0	0	0	0	0	0	0	0	0	0	0	0	0	0.0301557	0.025803	0.105896	0	0.0783966	0.0715904	0.140389	0.0878382	0.0810921	0.0819817	0.171127	0.110137	0.190771	0.28229	0.307309	0.330216	0.300111	0.283842	0.32039	0.324365	0.343954	0.355839	0.295165	0.335695	0.363332	0.496257	0.52984	0.653592	0.823839	0.996122	1.1275	1.22377	1.30645
Nitrogen
N_OW	0	0	0	0	0	0	0	0	0	0	0	0	0	0	0	0	0	0	0	0	0	0	0	0	0	0	0	0	0	0	0	0	0	0	0	0	0	0	0	0	0	0	0	0	0	0	0.311827	0.305495	0
N_HW	0	0	0	0	0	0	0	0	0	0	0	0	0	0	0	0	0	0	0	0	0	0	0	0	0	0	0	0	0	0	0	0	0	0	0	0	0	0.243875	0	0.354404	0.246101	0.279109	0.244875	0.249379	0.280964	0.302646	0.317453	0.348333	0.252509
N1_OW	0	0	0	0	0	0	0	0	0	0	0	0	0	0	0	0	0	0	0	0	0	0	0	0	0	0	0	0	0	0	0	0	0	0	0	0	0	0	0	0	0	0	0	0.640808	0	0.683273	0.652278	0	0
N1_HW	0	0	0	0	0	0	0	0	0	0	0	0	0	0	0	0	0	0	0	0	0	0	0	0	0	0	0	0	0	0.919816	0	0.500958	0	0	0	0	0	0.559691	0.927888	1.89019	2.92719	3.57986	1.24722	2.37373	1.23141	0.565946	0.585296	1.68113	0.538112
N2_OW	0	0	0	0	0	0	0	0	0	0	0	0	0	0	0	0	0	0	0	0	0	0	0	0	0	0	0	0	0	0	0	0	0	0	0	0	0	0	0	0	0	0	0.603498	0	0	0.460865	0.403296	0	0.393256
N2_HW	0	0	0	0	0	0	0	0	0	0	0	0	0	0	0	0	0	0	0	0	0	0	0	0	0	0	0	0	0	0	0.484648	0	0	0.470685	0	0	0	0.549357	0.793879	0.670839	0.731453	0.665507	0.346417	0.336523	0.563773	0.458206	0.293611	0.579433	0.451739
N3_OW	0	0	0	0	0	0	0	0	0	0	0	0	0	0	0	0	0	0	0	0	0	0	0	0	0	0	0	0	0	1.19263	0	0	0	0	0	0	0	0	0	0	0	0	0.562483	0	0	0.856106	0	0.402417	0.322023
N3_HW	0	0	0	0	0	0	0	0	0	0	0	0	0	0	0	0	0	0	0	0	0	0	0	0	0	0	0	0	0	0	0	0.663074	0	0.360084	0	0	0	0.284929	0.455501	0.304716	0	0.274813	0.23465	0.197026	0.413746	0.276108	0.515707	0.175556	0.295016
NA_OW	0	0	0	0	0	0	0	0	0	0	0	0	0	0	0	0	0	0	0	0	0	0	0	0	0	0	0	0	0	0	0	0	0	0	0	0.855956	0	0	0	0	0.399062	0	0	0	0.403821	0.329371	0	0	0.377063
NA_HW	0	0	0	0	0	0	0	0	0	0	0	0	0	0	0	0	0	0	0	0	0	0	0	0	0	0	0	0	0	0	0	0	0	0.379162	0.307036	0.544231	0	0.341407	0.597858	0.484494	0.326856	0.336114	0.352831	0.404437	0.429748	0.418452	0.339549	0.30597	0.428478
NB_OW	0	0	0	0	0	0	0	0	0	0	0	0	0	0	0	0	0	0	0	0	0	0	0	0	0	0	0	0	0	0	0	0	0	0.515333	0	0	0.404056	0.315696	0	0.568624	0.34819	0.245727	0.316065	0	0.472315	0.443368	0.39786	0.364712	0.31909
NB_HW	0	0	0	0	0	0	0	0	0	0	0	0	0	0	0	0	0	0	0	0	0	0	0	0	0	0.697748	0.368803	0	0.463412	0.337434	0.324149	0.312419	0.568546	0.38922	0.289441	0.380618	1.0874	2.02756	2.68061	3.14348	2.66268	2.28259	1.34776	0.634172	0.46981	0.67043	0.53266	0.561376	0.489719
NC_OW	0	0	0	0	0	0	0	0	0	0	0	0	0	0	0	0	0	0	0	0	0	0	0	0	0	0	0	0	0	0	0	0.645651	0	0	0	0	0	0	0	0	0	0	0.518145	0.401339	0	0.356321	0.4302	0	0
NC_HW	0	0	0	0	0	0	0	0	0	0	0	0	0	0	0	0	0	0	0	0	0	0	0	0	0	0.600079	0	0	0	0	0.544035	0.331908	0.445993	0.556502	0.513573	0.397749	0.965586	2.41034	3.07385	4.26491	2.57267	1.99535	1.02993	0.70658	0.766913	0.614527	0.52202	0.390317	0.489079
NO_OW	0	0	0	0	0	0	0	0	0	0	0	0	0	0	0	0	0	0	0	0	0	0	0	0	0	0	0	0	0	0	0	0	0	0	0	0	0	0	0	0	0	0	0	0.564465	0	0	0	0	0.592104
NO_HW	0	0	0	0	0	0	0	0	0	0	0	0	0	0	0	0	1.28125	0	0	0.899502	0	0	0	1.67481	0	0	1.30396	0.766846	0.864645	0	0	1.03372	0	0.510844	0.479855	0	0	0.375349	0.49235	0.338035	0	0	0.537104	0.234261	0	0.700696	0	0.266847	0.563738
NS_OW	0	0	0	0	0	0	0	0	0	0	0	0	0	0	0	0	0	0	0	0	0	0	0	0	0	0	0	0	0	0	0	0	0	0	0	0	0	0	0	0	0	0	0.547402	0.44431	0.365607	0.462084	0	0.422343	0
NS_HW	0	0	0	0	0	0	0	0	0	0	0	0	0	0	0	0	0	0	0	0	0	0	0	0	0	0	0	0	0.479915	0	0	0	0.419953	0	0	0.395275	0	0.33298	0.315447	0.29079	0.284324	0.385185	0.25027	0.334913	0.213122	0.537361	0.240259	0.410324	0.322381
NT_OW	0	0	0	0	0	0	0	0	0	0	0	0	0	0	0	0	0	0	0	0	0	0	0	0	0	0	0	0	0	0	0	0	0	0	0	0	0	0	0	0	0	0.410569	0	0.492696	0.355895	0.413786	0	0	0.341808
NT_HW	0	0	0	0	0	0	0	0	0	0	0	0	0	0	0	0	0	0	0	0	0	0	0	0	0	0	0	0	0	0.534199	0	0	0	0	0.456951	0.33509	0.625174	2.02729	2.75521	2.365	1.59958	1.25057	0.881808	0.55522	0.49986	0.50744	0.51745	0.347849	0.551651
Av N OW	0	0	0	0	0	0	0	0	0	0	0	0	0	0	0	0	0	0	0	0	0	0	0	0	0	0	0	0	0	0.119263	0	0.0645651	0	0.0515333	0	0.0855956	0.0404056	0.0315696	0	0.0568624	0.0747252	0.0656296	0.254759	0.254362	0.159764	0.400517	0.219546	0.149497	0.234534
Av N HW	0	0	0	0	0	0	0	0	0	0	0	0	0	0	0	0	0.128125	0	0	0.0899502	0	0	0	0.167481	0	0.129783	0.167277	0.0766846	0.180797	0.179145	0.135283	0.284208	0.143449	0.26665	0.204686	0.205296	0.267816	0.915277	1.20926	1.41069	1.13509	1.10491	0.647286	0.602625	0.486934	0.505181	0.386401	0.506714	0.438242
Oxygen
O_OW	0	0	0	0	0	0	0	0	0	0	0	0	0	0	0	0	0	0	0	0	0	0	0	0	0	0	0	0	0	0	0	0	0	0	0	0	0	0	0.364428	0	0.338229	0	0	0.373636	0	0.34405	0.392171	0.347314	0.319994
O_HW	0	0	0	0	0	0	0	0	0	0	0	0	0	0	0	0	0	0	0	0	0	0	0	0	0	0	0	0	0.369088	0.53022	0.332113	0.350511	0.336065	0.407729	0.596505	1.15594	3.20916	5.59409	5.87571	4.0945	2.58229	1.84032	1.12675	1.00932	0.779349	0.638721	0.645544	0.602067	0.604474
O2_OW	0	0	0	0	0	0	0	0	0	0	0	0	0	0	0	0	0	0	0	0	0	0	0	0	0	0	0.386256	0	0.395193	0	0	0	0.349775	0.457287	0.403775	0.502192	0.421598	0.419739	0.397638	0.547465	0.216279	0.440839	0.15706	0.37365	0.326088	0.273196	0.395862	0.490482	0.368231
O2_HW	0	0	0	0	0	0	0	0	0	0	0	0	0	0	0	0	0	0	0	0	0	0	0	0	0	0	0.329938	0.399769	0.270541	0.422623	0.585055	0.547299	0.340457	0.62741	1.68749	3.30599	4.95214	5.28246	4.17197	2.24839	1.74751	0.992114	0.822206	0.60855	0.631169	0.49358	0.526354	0.58977	0.460677
OH_OW	0	0	0	0	0	0	0	0	0	0	0	0	0	0	0	0	0	0	0	0	0	0	0	0	0	0	0	0	0	0	0	0	0	0	0	0	0.401527	0	0	0.391826	0	0	0	0.330442	0.327547	0.453009	0.454637	0.414048	0.377207
OH_HW	0	0	0	0	0	0	0	0	0	0	0	0	0	0	0	0	0	0	0	0	0	0	0	0	0	0	0	0	0	0	0	0	0	0	0.475558	0.871495	2.56322	3.68507	3.18817	2.5151	1.44497	1.04871	0.881278	0.803433	0.657281	0.552624	0.561811	0.514041	0.4822
OS_OW	0	0	0	0	0	0	0	0	0	0	0	0	0	0	0	0	0	0	0	0	0	0	0	0	0	0	0	0	0	0	0	0	0	0	0	0	0	0	0	0	0	0	0	0	0	0	0.268932	0	0
OS_HW	0	0	0	0	0	0	0	0	0	0	0	0	0	0	0	0	0	0	0	0	0	0	0	0	0	0	0	0	0	0	0	0	0.278411	0	0	0.29738	0.360367	0.797087	1.19714	1.08844	0.971122	0.868464	0.55001	0.719371	0.602251	0.478355	0.279415	0.527053	0.402588
Av O OW	0	0	0	0	0	0	0	0	0	0	0	0	0	0	0	0	0	0	0	0	0	0	0	0	0	0	0.096564	0	0.0987984	0	0	0	0.0874438	0.114322	0.100944	0.125548	0.205781	0.104935	0.190517	0.234823	0.138627	0.11021	0.0392649	0.269432	0.163409	0.267564	0.3779	0.312961	0.266358
Av O HW	0	0	0	0	0	0	0	0	0	0	0	0	0	0	0	0	0	0	0	0	0	0	0	0	0	0	0.0824844	0.0999422	0.159907	0.238211	0.229292	0.224452	0.238733	0.258785	0.689889	1.4077	2.77122	3.83968	3.60824	2.48661	1.68647	1.1874	0.84506	0.785168	0.667512	0.54082	0.503281	0.558233	0.487485
Halogen
Cl_OW	0	0	0	0	0	0	0	0	0	0	0	0	0	0	0	0	0	0	0	0	0	0	0	0	0	0	0	0	0	0	0	0	0	0	0	0	0	0	0	0	0	0	0	0	0	0	1.00521	0	0.66746
Cl_HW	0	0	0	0	0	0	0	0	0	0	0	0	0	0	0	0	0	0	0	0	0	0	0	0	0	0	0	0	0	0	0	0.662021	0.733475	0	0	0	0.667703	0	0	0.340624	0	0	0.29316	0	0.680515	0.254967	0.784294	0.491971	0.39783
F_OW	0	0	0	0	0	0	0	0	0	0	0	0	0	0	0	0	0	0	0	0	0	0	0	0	0	0	0	0	0.781657	0	0.494039	0	0	0	0	0.316047	0	0	0	0.581263	0.378892	0.327638	0.2814	0.208277	0.482813	0.299126	0.181718	0	0.358005
F_HW	0	0	0	0	0	0	0	0	0	0	0	0	0	0	0	0	0	0	0	0	0	0	0	0	0.33117	0	0.483118	0.558085	0.380024	0.580158	0.480381	0.22469	0.315964	0.44613	0.256097	0.219507	0	0.372627	0.29727	0.370908	0.552626	0.238935	0.501638	0.347175	0.331387	0.462727	0.302905	0.495433	0.638198
Other
P_OW	0	0	0	0	0	0	0	0	0	0	0	0	0	0	0	0	0	0	0	0	0	0	0	0	0	0	0	0	0	0	0	0	0	0	0	0	0.539991	0.509802	0	0	0	0.569339	0	0	0	0	0	0	0
P_HW	0	0	0	0	0	0	0	0	0	0	0	0	0	0	0	0	0	0	0	0	0	0	0	0	0	0	0	0	0	0	0	0	0	0	0	0	0	0	0	0.33768	0.320166	0	0	0.437892	0.241988	0.421273	0	0.327285	0.25882
S_OW	0	0	0	0	0	0	0	0	0	0	0	0	0	0	0	0	0	0	0	0	0	0	0	0	0	0	0	0	0	0	0	0	0	0	0	0	0	0	0	0	0	0	0	0	0	0	0	0	0.611527
S_HW	0	0	0	0	0	0	0	0	0	0	0	0	0	0	0	0	0	0	0	0	0	0	0	0	0	0	0	0	0	0	0	0	0	0	0	0	0	0	0.444282	0	0.433818	0	0	0	0.220121	0.289799	0	0	0
SO_OW	0	0	0	0	0	0	0	0	0	0	0	0	0	0	0	0	0	0	0	0	0	0	0	0	0	0	0	0	0	0	0	0	0.637867	0	1.36973	0	0	0	0.450094	0	0	0.385888	0	0	0	0	0	0	0.281103
SO_HW	0	0	0	0	0	0	0	0	0	0	0	0	0	0	0	0	0	0	0	0	0	0	0	0	0	0	0	0	0	0	0	0	0	0	0	0	0	0	0	0.59575	0.310668	0.510422	0.435826	0.487926	0.30273	0.646609	0.191569	0.387205	0.547946
Water
HW_OW	0	0	0	0	0	0	0	0	0	0	0	0	0	0	0	0	1.37352	2.59524	3.70988	3.68133	5.77417	214.748	3.70162	2.25107	1.56177	1.24791	0.881608	0.851428	0.713358	0.55107	0.473845	0.509756	0.557535	0.497106	0.678226	1.00321	1.99033	2.45167	2.10267	1.50294	1.13757	0.872555	0.661751	0.489896	0.464894	0.438174	0.355221	0.406051	0.412046
[truncated: 162 more columns]
