# Supplementary material for: Probing the average distribution of water in organic hydrate crystal structures with radial distribution functions (RDFs)
Source: Royal Society of Chemistry journal article supplement (doi:10.1039/c6ce02119k), 2016-12-19
Supplement: c6ce02119k20.csv [file c6ce02119k20.csv]

Index	NAME	Study Temp.
1	AAGAGG10	138
2	AAGGAG10	138
3	ABAYIN	150
4	ABCOCX	295
5	ABEJEX	295
6	ABEKAU	133
7	ABENIF	293
8	ABENIG	293
9	ABIMIH	110
10	ABIYIT	296
11	ABIYIT01	298
12	ABIYOZ	296
13	ABOBID	293
14	ABOJOR	173
15	ABOMOT	293
16	ABONAG	173
17	ABOQOZ	298
18	ABOSUG	150
19	ABOVES	150
20	ABUBUV	186
21	ABUCEF	295
22	ABUFUZ	293
23	ABULIU	293
24	ABUMOB	173
25	ACATON	295
26	ACAWUW	295
27	ACAYEJ	133
28	ACAYEJ01	293
29	ACEQOQ	100
30	ACERIL	100
31	ACEROR	100
32	ACERUX	100
33	ACESIM	298
34	ACESOS	100
35	ACETEH	100
36	ACEXUC	294
37	ACHIST20	295
38	ACICIA	291
39	ACILUT	293
40	ACIWIS	293
41	ACIXUH	100
42	ACLACT	295
43	ACOHAC	193
44	ACOHUX	150
45	ACONAM01	180
46	ACOZEY	150
47	ACUFIP	113
48	ACXMAC	295
49	ADAKEW	294
50	ADALAU	223
51	ADAMAU	293
52	ADAQOM	298
53	ADATEF	296
54	ADAWIN	123
55	ADAYIO	120
56	ADEJOJ	150
57	ADENSH	295
58	ADESIM	298
59	ADETOS	295
60	ADIBEV	296
61	ADIBOF	294
62	ADIKIJ	120
63	ADIWAM	296
64	ADODON	293
65	ADOYOH	183
66	ADPOSD	295
67	ADUNUK	100
68	AECLPA10	295
69	AFABIT	153
70	AFAKIC	295
71	AFAKOI	295
72	AFAKUO	295
73	AFCYDP	295
74	AFENEG	296
75	AFENOP	293
76	AFEQEI	299
77	AFIDOK	293
78	AFIHED	223
79	AFIMAE	120
80	AFUWED	298
81	AFUWED01	293
82	AFUWON	100
83	AGAMUS	173
84	AGAQUV	160
85	AGIGII	293
86	AGOBIJ	100
87	AGOKUD	120
88	AGOMAK	295
89	AHEKAZ	293
90	AHEKAZ01	120
91	AHIMUA	291
92	AHINAG	160
93	AHINUA	293
94	AHIPAI	160
95	AHLPRO	295
96	AHMVAL	295
97	AHOWOJ	273
98	AHULIZ	180
99	AHUXOR	298
100	AJAREJ	200
101	AJEGUS	173
102	AJERUD	298
103	AJESUE	298
104	AJETUF	296
105	AJEZAR	130
106	AJISIW	294
107	AJIXOG	93
108	AJODUY	200
109	AJULIB	293
110	AJUPAW	173
111	AJUPOL	295
112	AJUWIL	293
113	AKAVIR	293
114	AKIFAB	100
115	AKIJEK	110
116	AKIJEK01	110
117	AKIJEK02	110
118	AKOFIQ	273
119	AKOZOP	295
120	ALACAR	295
121	ALACIL	295
122	ALANTD	295
123	ALATOL10	295
124	ALDAHA10	295
125	ALIVEW	293
126	ALOLUI	273
127	ALORID	153
128	ALOSID	123
129	ALUPAZ	100
130	AMAFAP	295
131	AMAQIO	295
132	AMAQOU	295
133	AMAQUA	295
134	AMARAH	296
135	AMAREL	296
136	AMBZPY	295
137	AMCHCA	295
138	AMDOAD	295
139	AMEQAK	293
140	AMEVET	293
141	AMHPYR	295
142	AMIFAE	20
143	AMIMZB10	295
144	AMIOXO	295
145	AMOHXN	295
146	AMOXCT10	295
147	AMPIAB11	100
148	AMPTRA10	295
149	AMPYZP	295
150	AMPYZP01	120
151	AMTETZ	295
152	AMTETZ01	295
153	AMTURM	295
154	AMTURM01	295
155	AMTURM02	173
156	AMUWEL	296
157	ANDOON05	150
158	ANEUME	295
159	ANSFON02	120
160	ANTMYC01	110
161	ANUNAZ	293
162	ANUSUY	173
163	ANUVEL	120
164	ANUWAI	120
165	ANUWOW	290
166	APAQUE	294
167	APIVUR	295
168	APOLIB	100
169	APOLOH	100
170	APRTAM	295
171	APSURD	295
172	APTERN	295
173	APUWIS	150
174	AQABAW	173
175	AQACAW	295
176	AQACEA	295
177	AQAYAT	120
178	AQEBON	298
179	AQEBOO	200
180	AQFVMG	295
181	AQIDEK	293
182	AQILOC	100
183	AQOMAU	128
184	AQOMAU01	173
185	AQOMAU03	123
186	AQOMEY02	123
187	AQOQAZ	100
188	ARESEV	293
189	ARFMAD	295
190	ARGIND11	295
191	AROTIL	100
192	AROZUD	295
193	ASAGAC	293
194	ASAXUO	173
195	ASBEAC10	295
196	ASEXIG	296
197	ASEYOM	295
198	ASICEL	100
199	ASIRUP	218
200	ASOMEB	295
201	ASPARM02	295
202	ASPARM03	295
203	ASPARM05	100
204	ASPARM06	15
205	ASPARM07	173
206	ASPARM08	20
207	ASPARM09	100
208	ASPARM10	293
209	ASPGLY	295
210	ATAWEY	296
211	ATAYUQ	291
212	ATEWAY	293
213	ATEXIH	293
214	ATOFOF	173
215	ATOJIC	293
216	ATONIG	293
217	ATRTAX10	295
218	ATUKEF	183
219	ATUMUY	100
220	ATYREE01	295
221	ATYREE02	110
222	ATYREE03	295
223	AVEMUK	296
224	AVEPOH	150
225	AVEPUN	150
226	AVEQAU	298
227	AVEQUO	298
228	AVESEZ	295
229	AVIFEQ	173
230	AVIKIA	293
231	AVIKOG	293
232	AVIKUM	293
233	AVILUN	150
234	AVINAU	150
235	AVINEZ	293
236	AVOKIG	100
237	AVOMUT	293
238	AVOTIO	120
239	AVUQUD	293
240	AVUREO	293
241	AVUTUG	293
242	AVUVES	293
243	AWABIK	173
244	AWEXAB	100
245	AWOTUB	295
246	AWUHEG	293
247	AWUJAE	223
248	AWUKOS	190
249	AWUWIZ	223
250	AWUXUM	170
251	AXABUX	133
252	AXAFEL	298
253	AXASUO	150
254	AXEDUD	293
255	AXIDAM	273
256	AXIPED	273
257	AXIVAL10	295
258	AXONIK	293
259	AXORUA	113
260	AXOVUF	298
261	AXPTRG	295
262	AXUVUK	298
263	AYAGIR	295
264	AYASOJ	120
265	AYEBIP	298
266	AYELEW	295
267	AYIGAQ	100
268	AYILOJ	293
269	AYOPIO	100
270	AYOWOB	293
271	AYUFEG	173
272	AYUGAD	120
273	AYUHUY	296
274	AYULOW	296
275	AYUNEN	297
276	AYUYID	100
277	AZABOT	293
278	AZADEN20	295
279	AZANAQ	143
280	AZENOJ	120
281	AZGUAN	295
282	AZOTAL	223
283	AZOXAP	173
284	AZTUBC	295
285	AZULAJ	120
286	AZUQOB	298
287	BABFUH	150
288	BABRUR	295
289	BABYUA	93
290	BACPUR	293
291	BACQOL	200
292	BACXAE10	295
293	BADCUE10	295
294	BAFDUI	150
295	BAFFEU	150
296	BAFFIY	150
297	BAFGEW	295
298	BAFGIY	295
299	BAFJEY	209
300	BAFREF	295
301	BAFVUZ	295
302	BAFXOV	295
303	BAGJEY10	295
304	BAGPUW	293
305	BAGQAD	293
306	BAGSEH	295
307	BAGVEM	150
308	BAGXIS	291
309	BAGYIS	293
310	BAGZEO	295
311	BAHBES	293
312	BAHCOC	295
313	BAHGIC	293
314	BAHNAZ	295
315	BAHSUA	100
316	BAKGOJ	295
317	BAKGOJ01	295
318	BAKJUS	295
319	BAKLOO	295
320	BAKRIO	295
321	BAKZOD	100
322	BALDIC	295
323	BALGLH	295
324	BALSOY	123
325	BALTOZ	180
326	BALVOB	100
327	BAMLIK	295
328	BAMZEV	293
329	BANCEY	295
330	BANDUR	113
331	BANGON	93
332	BANGUT	93
333	BANKOR	123
334	BAPJIL	115
335	BAPNOX	296
336	BAPREP	295
337	BAQDEE	173
338	BARBAD	295
339	BARBAD01	295
340	BARRIV	295
341	BARSIW	293
342	BARSOC	295
343	BASDUU	295
344	BASHAE	295
345	BASTAR	213
346	BASZIE01	295
347	BATFAD	295
348	BAVDAD	295
349	BAWZII	295
350	BAXNAP	295
351	BAXNOD	295
352	BAXSUQ	293
353	BAZOAN10	295
354	BAZPIB	295
355	BCLMSN	271
356	BCRCIH10	295
357	BEBFOD	295
358	BEBNON	100
359	BEBQUU	295
360	BEBSOR	295
361	BECWEN	153
362	BECXUE	213
363	BECYOX	295
364	BEDSOT	293
365	BEDXUD	295
366	BEDXUD01	143
367	BEFQUZ	296
368	BEGFUO	173
369	BEGPAG	100
370	BEGWAM	150
371	BEGYUI	293
372	BEHBIA	100
373	BEHDAT	295
374	BEKBOJ	193
375	BEKFEC	295
376	BEKQOX	295
377	BEKWOE	193
378	BEKZIB	183
379	BELYAU	100
380	BELYEY	100
381	BEMBAW	295
382	BEMNEM	295
383	BEMXTZ10	295
384	BENRIW	273
385	BENSAP	293
386	BENTAC01	295
387	BENTAC02	295
388	BEPRAP	295
389	BEQJAJ	193
390	BEQJEN	193
391	BEQLOA	100
392	BEQLOZ	293
393	BEQVEZ	123
394	BEQWID	153
395	BEQXOK	295
396	BERMYA	295
397	BERPUJ	295
398	BESDUZ	123
399	BESKEQ	223
400	BESKIV	123
401	BESQIA	293
402	BESTIC	295
403	BESXON	293
404	BETQEW	100
405	BETQEW01	100
406	BETVOL	295
407	BEVGUE	295
408	BEVVOO	210
409	BEVXEF	295
410	BEVXEF01	123
411	BEXHAN	295
412	BEYDEP	100
413	BEYFIV	295
414	BEYPOL	200
415	BEYTUW	293
416	BGPLGQ	295
417	BIBGUQ	293
418	BIBWOY	295
419	BIBXIT	295
420	BICQUB	110
421	BICQUB01	110
422	BIFMIN	173
423	BIFMUZ	173
424	BIGFEC	295
425	BIGWET	295
426	BIGZAS10	295
427	BIHNAH	295
428	BIHNOW	123
429	BIHWAR	298
430	BIHXUL10	295
431	BIJDON03	295
432	BIJDON05	100
433	BIJFEH	100
434	BIJVIZ	295
435	BIKCIH10	295
436	BIKMUE	160
437	BIKPIV	294
438	BILJUD	123
439	BIMFUY10	295
440	BIMNER	200
441	BIMSAR	295
442	BINJIR	295
443	BINLAL	123
444	BIOIND	295
445	BIPCIN	293
446	BIPCIN01	293
447	BIPVUR10	295
448	BIPXED	295
449	BIRMEU	295
450	BIRMEU01	298
451	BIRMEU02	150
452	BIRMEU03	150
453	BITTIH	295
454	BIVHIX	295
455	BIVNOJ	295
456	BIVNOJ10	123
457	BIWBAK	295
458	BIWZIQ	295
459	BIXMOK	295
460	BIYPEF	298
461	BIYQAC	293
462	BIZSOS	295
463	BOBWAR	100
464	BOCAPR	295
465	BODBEB	295
466	BODJOT	295
467	BODPAL	295
468	BODQEQ	295
469	BOFBAA	294
470	BOFHAF	295
471	BOFWOI	295
472	BOGDIK	173
473	BOHHOV	295
474	BOHJIR	295
475	BOHJUE	295
476	BOHMOB	141
477	BOKXUU	173
478	BOLGAK	295
479	BOMXAD	293
480	BONKOF	223
481	BONPAV	295
482	BOPJAS	293
483	BOPQAY	295
484	BOPQAY01	295
485	BOPXAF	295
486	BOQBAK	295
487	BOQGOD	213
488	BOQPUS	123
489	BOQRII	120
490	BOQSUV	291
491	BOQVEI	130
492	BOQVEI01	130
493	BORHOG	113
494	BORMIE	295
495	BORPED	293
496	BOSGOF	295
497	BOSPUU	188
498	BOSXIQ	295
499	BOTMED	295
500	BOTMIH	295
501	BOTMOM	295
502	BOTXIS	292
503	BOVFAU	296
504	BOVVAK	298
505	BOWCAS	100
506	BOXXES	293
507	BOYHAZ	298
508	BOZCID	150
509	BOZHUU	273
510	BOZPOW	150
511	BPENOA10	295
512	BREDIN	295
513	BUBPEU	100
514	BUBPIY	100
515	BUDKOB	298
516	BUDNEU	293
517	BUDNEU01	293
518	BUDNIY	293
519	BUDPIA	296
520	BUDPUM	273
521	BUDTUP	295
522	BUDXUT	295
523	BUDYIJ	223
524	BUFCAH	90
525	BUFKOD	100
526	BUGJES01	295
527	BUGREB	293
528	BUHLEV10	295
529	BUHSOM	295
530	BUJWIN	100
531	BULMAW10	210
532	BUNYEO10	295
533	BUQQAF04	100
534	BURNUX10	295
535	BUSKUV	295
536	BUTEIN	295
537	BUTFUR	295
538	BUVGUV	293
539	BUVKIM	295
540	BUVYIA	295
541	BUVYIA01	295
542	BUXNAK	123
543	BUXPIT	295
544	BUXWIA	295
545	BUYPER	291
546	BXALPR	295
547	BXALPR10	295
548	BXCPLG	295
549	BZAPYR	295
550	CAARAB	295
551	CABFAN	293
552	CACGEU	293
553	CACGUI	295
554	CACGUI01	120
555	CACTUW	150
556	CACVEJ	293
557	CACVOT	180
558	CACYEL	120
559	CADFIY	291
560	CADGAQ	170
561	CADVUY	295
562	CADVUY01	100
563	CADYOV	295
564	CADZAI	295
565	CAFGOH	293
566	CAFKID	295
567	CAGPUX	173
568	CAGXIR	295
569	CAHDIA	173
570	CAHGID	173
571	CAHNEE	295
572	CAHSAH	100
573	CAHWEN	138
574	CAHZOC	173
575	CAHZUI	123
576	CAJSUB01	295
577	CAJVEP	293
578	CAKFAV	295
579	CAKHIF	295
580	CAKLEH	150
581	CAKPIO	100
582	CAKQAH	100
583	CAKZAP	295
584	CAKZUJ	295
585	CAKZUL	301
586	CALFOL	133
587	CALMAF	193
588	CALNIM	295
589	CALSAR	295
590	CALXAP	296
591	CALXES21	100
592	CAMTIU	293
593	CAMTUG	293
594	CAMVES	100
595	CAMVES01	100
596	CANCUQ	100
597	CAPCUS	293
598	CAPGUX	298
599	CAPHOQ	295
600	CAPJUA	150
601	CAPKAH	150
602	CAPLIQ	150
603	CAQMUD	293
604	CARBEC	295
605	CARNEO	295
606	CARNID	295
607	CARVAU	150
608	CASJIQ	120
609	CASLEO	100
610	CASPOC	293
611	CASWUQ	100
612	CATBEF	273
613	CATCEG	293
614	CATCOQ	293
615	CATCUW	293
616	CATNUI	293
617	CATPIY	296
618	CATXIE	295
619	CAVBIK	295
620	CAVNOC	295
621	CAVQOG	293
622	CAVREX	293
623	CAWFIQ	293
624	CAXDIO	295
625	CAXDIO01	295
626	CAXKUH	295
627	CAXSUP	143
628	CAYJUI	294
629	CAYNUL	295
630	CAYPIC	294
631	CAYPOI	293
632	CAYRAW	294
633	CAYREA	295
634	CAYZEJ	150
635	CAZPAW	293
636	CAZPEA	293
637	CAZWAB	295
638	CDPHXO	295
639	CEBBUG	295
640	CEBQEG	293
641	CECMEC10	295
642	CECXAL	293
643	CEDBOC	295
644	CEDFOG	295
645	CEDJEA	123
646	CEDPIM	295
647	CEDRUA	100
648	CEFGOJ	295
649	CEFXIV	100
650	CEGHIF	223
651	CEGLUX	100
652	CEGNOT	296
653	CEGWAN	160
654	CEGZEV	173
655	CEHBEY	298
656	CEHGUR	295
657	CEHHAY	295
658	CEHHEE	100
659	CEHTAK10	295
660	CEJMUZ	295
661	CEJYAR	295
662	CEKKAF	150
663	CEKKIO	173
664	CEKKIO01	298
665	CEKNUD	100
666	CEKPAJ	295
667	CEKQEO	295
668	CEKXIZ	295
669	CEKXUL	295
670	CELBUQ	295
671	CELGEF	295
672	CELGIJ	295
673	CELKAG	296
674	CELKAG01	295
675	CELPIT	120
676	CELWEX	100
677	CEMLAH	295
678	CEMQUG	150
679	CEMXEY	140
680	CENGUX	295
681	CENYUR	113
682	CEPBUU	295
683	CEPTIA	295
684	CEQJEO	173
685	CERVEA	295
686	CERXAY	295
687	CESJAL	295
688	CESKOA	295
689	CESWAZ	100
690	CESYIJ	293
691	CESYOP	293
692	CETKOD	100
693	CETMPA01	263
694	CETMPA10	295
695	CETSAW	293
696	CETWED	295
697	CETZAD	200
698	CETZUY	298
699	CEVCAJ	293
700	CEVLAS	120
701	CEVYEH01	100
702	CEVYEH11	100
703	CEWCIQ10	295
704	CEWHOC	291
705	CEWJAQ	291
706	CEWJUK	150
707	CEWWAC01	295
708	CEXFUH	150
709	CEXXIN	100
710	CEYDAM	296
711	CEYVAD	295
712	CEYZEL	295
713	CEZROQ	293
714	CEZSAD	130
715	CEZTEH	220
716	CFHBZP	295
717	CGLPGL	295
718	CHPSAR	295
719	CHXAMH	295
720	CHXAMH03	295
721	CHXAMH04	150
722	CIBQIP	296
723	CICKAB	173
724	CICSIR	298
725	CICSUC	295
726	CIDFUS	293
727	CIDYAP	295
728	CIFGEE	294
729	CIFNUB	293
730	CIGMUB	293
731	CIGPIT	273
732	CIHCOM	295
733	CIHFAB	190
734	CIHKUZ	295
735	CIHMUB	295
736	CIHNUC	295
737	CIJHAE	295
738	CIJHIN	293
739	CIJMEO	299
740	CIJWOI	295
741	CIJYOK	297
742	CIJYUQ	120
743	CIKDOQ	130
744	CIKLEO	295
745	CIKSUL	298
746	CILTIA	295
747	CIMBOP	138
748	CIMGUA	295
749	CIMMEQ	295
750	CIMTOI	163
751	CINTUO	295
752	CIPDIP	297
753	CIPSIE	293
754	CIQFOY	150
755	CIQFUE	298
756	CIQQID	293
757	CIQSEB	173
758	CIQYEH	100
759	CIQYEH01	295
760	CIRTEC02	295
761	CISPOJ	295
762	CISSON	173
763	CISTEE	173
764	CITARC	295
765	CITARC01	90
766	CITLAS	295
767	CITYAF10	295
768	CITZIO10	295
769	CIVDAM10	295
770	CIWCEQ10	295
771	CIWKOJ	293
772	CIWKOJ01	93
773	CIXBIV	100
774	CIXMAX	193
775	CIXROQ	295
776	CIYNIH	295
777	CIZMOO	143
778	CIZRAE	295
779	CIZRAE01	295
780	CIZWEN	295
781	CLANDH	295
782	CLEUHS	295
783	CLHISP10	295
784	CLIVOR10	113
785	CLPNXB	295
786	CLTRHS	295
787	CMPYTO	295
788	CMRIFM10	295
789	CNHYDM	295
790	CNPREG	295
791	COBHIK	295
792	COBVOF	120
793	COBZID	293
794	COCGOQ	150
795	COCVEW	293
796	CODPER	123
797	COFMEP10	295
798	COFOMY10	295
799	COJLAP	293
800	COKBUZ	295
801	COKCOV	293
802	COKTOM	295
803	COKVAA	165
804	COLLET	295
805	COMBOV	295
806	COMPAW	218
807	COMWEG	295
808	COMWEH	100
809	COMWIK	153
810	CONYIO	100
811	COPHOE	295
812	COPNOK01	293
813	COQCOA	295
814	COQDOC	298
815	COQLAV	295
816	COQLEZ	295
817	COQWOU	295
818	COQWOU01	150
819	COQWOU02	120
820	COSDAP	295
821	COSDUJ	295
822	COSFIA	293
823	COSGAS	295
824	COSGUM	295
825	COSNUU	100
826	COTCAP	295
827	COTGEY	120
828	COTVOX	295
829	COTZIV	100
830	COWHEC	296
831	COWNOR	295
832	COWTIR	295
833	COWYAP	295
834	COWZOD	148
835	COXJUU	295
836	COXNEI	295
837	COXXUJ	100
838	COYHUT10	295
839	COYKUX	296
840	COYNUZ	295
841	COYPAH	295
842	COYYUL	173
843	COZGEE	173
844	CPCHOM	233
845	CPMIAL10	295
846	CPRPCY	295
847	CREATH01	295
848	CREATH03	295
849	CREATH04	20
850	CREATH05	123
851	CREATH07	273
852	CROTFE	295
853	CSEHSM	295
854	CTOGBS20	295
855	CUBKEQ	150
856	CUBMOC	293
857	CUBWEC	293
858	CUBWUS	293
859	CUCKER	293
860	CUDYUV	295
861	CUFSEC	293
862	CUFSIG	150
863	CUFYEH	295
864	CUHNUO10	295
865	CUHREC10	295
866	CUHRIG10	295
867	CUKCOB	150
868	CULHIA	295
869	CUMYEO	295
870	CUNSAG	293
871	CUNSIO	293
872	CUPBUK	120
873	CUPDOH	200
874	CUPHUQ	295
875	CUPQAG	123
876	CUPRAH	120
877	CUQGIE	295
878	CUQWOA	295
879	CUTFIG	241
880	CUTPIR	203
881	CUTPIR01	110
882	CUVDIH	296
883	CUYFOR	295
884	CUYNIU	123
885	CUYWAU	154
886	CUZSIZ	295
887	CUZXUR	153
888	CUZZOM	295
889	CXMPCT	295
890	CYSTAC	295
891	CYSTAC01	295
892	CYSTAC02	293
893	CYSTAC03	293
894	CYSTAC04	293
895	CYSTAC05	293
896	CYSTAC06	293
897	CYSTAC07	293
898	CYSTAC08	293
899	CYSURC10	295
900	CYTOSM	295
901	CYTOSM02	295
902	CYTOSM03	97
903	CYTOSM11	295
904	CYTOSM12	90
905	CYTOSM13	100
906	DABBOX	295
907	DABHAP	295
908	DABNUQ01	288
909	DABRUV	150
910	DABWOU	180
911	DABWUY10	295
912	DABXAF10	295
913	DACAMG	295
914	DAFFUL	295
915	DAGGIC	293
916	DAHMOQ	173
917	DAJBIB	293
918	DAJMEI	100
919	DAJQIP	293
920	DAJWOA	295
921	DAKQUB	173
922	DAKYET	295
923	DANJUX	295
924	DANYAU	100
925	DAPBUS	298
926	DAPGLU	295
927	DAPHET	295
928	DAPHET01	298
929	DAQHIM	295
930	DAQHOS	150
931	DAQRUJ	293
932	DAQTEU	295
933	DASHIO	295
934	DASYUS	198
935	DATFAH	293
936	DATNET	173
937	DAVFIR	298
938	DAVGAI	295
939	DAVSAV	296
940	DAWDUB	143
941	DAWJOA	295
942	DAXFAK	293
943	DAYFIT	120
944	DAYGUG	120
945	DAYJOD	173
946	DAYKEU	298
947	DAYQOK	294
948	DAYVOO	295
949	DAZBIQ	292
950	DAZDUF	173
951	DAZGUI	120
952	DAZHAP	120
953	DBTYRS	295
954	DEBGOG	295
955	DEBJEA	223
956	DEBSOS01	294
957	DEBZUH	170
958	DECJAW	295
959	DECJAW01	105
960	DECLOM	295
961	DEDBET	295
962	DEDXUF	295
963	DEFMUW	295
964	DEFMUW01	213
965	DEFQUC	295
966	DEFRUB	295
967	DEFRUB01	295
968	DEFRUB03	295
969	DEFSUC	295
970	DEGHED	193
971	DEGNIM	295
972	DEHBUP	273
973	DEHHIH	295
974	DEHMOT	123
975	DEHMUZ	123
976	DEHPAJ	183
977	DEHQOW	295
978	DEJJEH	295
979	DEJMAI	100
980	DEJSAM	295
981	DEKJOS	295
982	DEKKIO	296
983	DEKKOU	296
984	DEKPEQ	150
985	DELCUU	295
986	DELDAA	293
987	DELQER	293
988	DEMXEY	295
989	DEPREV	295
990	DEQTAU	150
991	DEQTUO	295
992	DERGOW	233
993	DERHAK	298
994	DERKOB	110
995	DESGOY	293
996	DETFUE	198
997	DETGAL	198
998	DETJOC	293
999	DETNOF	295
1000	DETQEZ	293
1001	DEVCOX	173
1002	DEXFAP	193
1003	DEXWEJ	296
1004	DEXWOT	100
1005	DEYREF	298
1006	DEZBOA	173
1007	DEZHOG	293
1008	DEZMAW	295
1009	DEZNEC	293
1010	DEZNIG	293
1011	DEZNON	293
1012	DEZQOO	150
1013	DGLACM10	295
1014	DHANDR	295
1015	DIALAC02	295
1016	DIBCOG	295
1017	DIBGOL	150
1018	DICVOB	296
1019	DICYOE	293
1020	DICYUJ	295
1021	DICYUK	293
1022	DIDDUQ	160
1023	DIDXOE	295
1024	DIDZIZ	295
1025	DIFFEE	293
1026	DIFPEO	187
1027	DIJJIQ	295
1028	DIJWOJ	233
1029	DIKROF	296
1030	DIKSIZ	295
1031	DIKTEW	295
1032	DIKTIA	295
1033	DILFAF01	295
1034	DILMAM	295
1035	DIMZAA10	128
1036	DIMZEE10	128
1037	DIPDAH10	295
1038	DIPICA10	295
1039	DIPKGA	295
1040	DIPMUK	193
1041	DIQHAM	295
1042	DIRBUB	295
1043	DISLUN	180
1044	DISNEZ	298
1045	DIVFOD	133
1046	DIWFEV	100
1047	DIWNIH	273
1048	DIWNON	296
1049	DIWNON01	120
1050	DIXLOM	293
1051	DIXMIH	100
1052	DIYHOJ	293
1053	DIYTOV	213
1054	DIYVUC	295
1055	DIYZEQ	295
1056	DIYZEQ01	295
1057	DIYZIU	295
1058	DIZJOM	293
1059	DIZPEH	295
1060	DLPROM01	295
1061	DLPROM02	100
1062	DOBHEI	113
1063	DOBJAG	295
1064	DOBMIR	113
1065	DOCHHY	295
1066	DOCVOG	295
1067	DOCYPO	295
1068	DOCYPO01	295
1069	DOCYPO03	123
1070	DOCYPO04	123
1071	DOFJOX	295
1072	DOFLIN	295
1073	DOGQOF	153
1074	DOGQUL	295
1075	DOGSIB	295
1076	DOHFAH	295
1077	DOHLES	295
1078	DOHLIW	295
1079	DOHLOC	295
1080	DOHXEE	293
1081	DOHXII	293
1082	DOKLOF	298
1083	DOKVAB	298
1084	DOKVEF	113
1085	DOLRUR	295
1086	DONJIZ	295
1087	DOTHAV	295
1088	DOTNAB	295
1089	DOVMIL	293
1090	DOVRUB	295
1091	DOVXIW	105
1092	DOVXUI	100
1093	DOVYAP	100
1094	DOWHAZ	293
1095	DOXADM	295
1096	DOXADM02	110
1097	DOYRIT	296
1098	DPCPRO10	295
1099	DRPRDL	295
1100	DTGUOS	295
1101	DTURID	295
1102	DTURID01	295
1103	DUBCAE	295
1104	DUBKAN	173
1105	DUBQUN	100
1106	DUBTAW	150
1107	DUBTUQ	150
1108	DUCCAF	295
1109	DUCMAQ	100
1110	DUDCEL	293
1111	DUDDIQ	273
1112	DUDGAL	273
1113	DUDPIB	295
1114	DUDPOH	150
1115	DUDPUN	150
1116	DUFMAS	295
1117	DUFVAC	295
1118	DUFVEG	295
1119	DUHFOB	180
1120	DUHKEW	295
1121	DUHSII	295
1122	DUHSII10	295
1123	DUJLUQ	295
1124	DUJNAY	120
1125	DUJNEC	120
1126	DUJPED	295
1127	DUKKAW	296
1128	DUKKAW02	296
1129	DUKSIL	295
1130	DUKTIN	120
1131	DUKTOT	120
1132	DUKWIQ	173
1133	DULFAR	295
1134	DULLEC	120
1135	DUMZAN	113
1136	DUNFAU	298
1137	DUPPAF	295
1138	DUPPAF10	295
1139	DUPYIW	295
1140	DURLIM	173
1141	DURTIT	295
1142	DUSBEZ	296
1143	DUSDEB	296
1144	DUSHEF	100
1145	DUSJUX	295
1146	DUSPIR	300
1147	DUSQOY	293
1148	DUSROZ	296
1149	DUTFED	295
1150	DUTGEF	296
1151	DUTGEF01	296
1152	DUTHOQ	100
1153	DUTJOR10	295
1154	DUTLAF10	295
1155	DUTWIZ	100
1156	DUVBIG	293
1157	DUVGOQ10	295
1158	DUVHEH10	295
1159	DUVXIB	295
1160	DUWBIG	133
1161	DUWMOX	295
1162	DUYFUZ	133
1163	DUYHIP	100
1164	DUYTIA	295
1165	DUZDEI	293
1166	DUZDIM	295
1167	DUZHIP	295
1168	DUZNAO	120
1169	DXIFPO	295
1170	EACNUR	295
1171	EBAQII	223
1172	EBATUW	298
1173	EBAWAG	173
1174	EBAWEK	173
1175	EBEPAD	293
1176	EBICEX	295
1177	EBIFIF	293
1178	EBIMOS	223
1179	ECACEQ	173
1180	ECANAZ	150
1181	ECANED	150
1182	ECAQII	293
1183	ECEGOJ	294
1184	ECIJOQ	295
1185	ECIKIM	173
1186	ECITZP	295
1187	ECIWOD	93
1188	ECPHBH	120
1189	ECUROK	296
1190	EDAFIZ	294
1191	EDEDUO	100
1192	EDEFAW	100
1193	EDEFEA	100
1194	EDEFOJ	293
1195	EDEJUS	150
1196	EDENUW01	120
1197	EDIDUQ01	223
1198	EDOJUE	293
1199	EDOSOG	293
1200	EDUPOJ	291
1201	EDUWEG	295
1202	EFAHUQ	123
1203	EFAJAY	298
1204	EFAJEC	173
1205	EFALAY	180
1206	EFAROU	296
1207	EFIDUS01	293
1208	EFIZOJ	150
1209	EFIZUP	133
1210	EFOBAD	293
1211	EFOGEM	120
1212	EFOYAA	120
1213	EFOYEE	120
1214	EFOYII	120
1215	EFOYOO	120
1216	EFOYUU	120
1217	EGADEW	125
1218	EGAZAN	293
1219	EGIGUX	293
1220	EGONET	100
1221	EGOVOL	293
1222	EGURED	298
1223	EGUSIJ	293
1224	EHAREL	200
1225	EHASAI	293
1226	EHASUC	296
1227	EHATOX	120
1228	EHILAJ	150
1229	EHOJAN	293
1230	EHOLOD	293
1231	EHUNEA	173
1232	EHUZIR	293
1233	EJABEX	293
1234	EJACEY	295
1235	EJADUP	173
1236	EJAFAX	173
1237	EJATOZ	298
1238	EJAWAO	293
1239	EJAXAP	295
1240	EJAYAQ	100
1241	EJEJUY	293
1242	EJENIQ	293
1243	EJEZUP	123
1244	EJIBII	298
1245	EJIBUV	173
1246	EJINOA	163
1247	EJISEW	293
1248	EJUKEZ	296
1249	EJUPUU01	298
1250	EKAFEC	193
1251	EKALOR	93
1252	EKEKIO	90
1253	EKONIB	293
1254	EKONUN	120
1255	EKUZUG	150
1256	ELABAV	120
1257	ELABEZ	100
1258	ELEVOG	123
1259	ELIDIM	100
1260	ELIPAQ	295
1261	ELOBOX	296
1262	ELOGOB	293
1263	ELUMII	295
1264	ELUNII	173
1265	EMAWEV	293
1266	EMEWUP	123
1267	EMIKUG	100
1268	EMIPAR	105
1269	EMIPOF	120
1270	EMIROI	100
1271	EMIRUO	100
1272	EMOHAQ	100
1273	EMOHEU	293
1274	EMUBIX	173
1275	EMUFOI	100
1276	EMUTAI	223
1277	ENEJUD	120
1278	ENEKAK	120
1279	ENELIS	100
1280	ENEMUG	150
1281	ENIVED	294
1282	ENIVON	150
1283	ENODER	130
1284	ENOPUT	173
1285	ENUCIA	200
1286	ENUJED	296
1287	ENUNEH	293
1288	EPAHIN	120
1289	EPELAN	293
1290	EPETOJ	298
1291	EPEVAX	296
1292	EPHEDH02	120
1293	EPHEDH04	295
1294	EPICZA	295
1295	EPITAZ	298
1296	EPXPOM	295
1297	EQIPIE	293
1298	EQITOO	293
1299	ERAGUZ	120
1300	ERAHAG	110
1301	ERERAU	110
1302	ERISII	113
1303	ERISOO	296
1304	ERIVAD	296
1305	EROLED	100
1306	EROMAA	298
1307	EROMAA01	296
1308	ERONUV	296
1309	EROQAE	296
1310	ERUBUP	296
1311	ERUDEB	293
1312	ERUHOP	100
1313	ERUHUV	100
1314	ERUQOX	295
1315	ERURUE	120
1316	ESEDMH	103
1317	ESEGAL	100
1318	ESEMAQ	293
1319	ESEMAQ01	100
1320	ESTDOL10	295
1321	ESTDOM	295
1322	ESUFON	293
1323	ESUKEI	100
1324	ESUXUL	289
1325	ETEXUW	120
1326	ETHDPH	295
1327	ETHDPH01	293
1328	ETIFET	100
1329	ETIPUS	293
1330	ETIWOU	100
1331	ETIYIP	293
1332	ETONIK	105
1333	ETOZOC	125
1334	ETOZUI	125
1335	ETUNUC	296
1336	ETUZUP	296
1337	EVAFIR	295
1338	EVAPAT	298
1339	EVAQAU	296
1340	EVARUP	293
1341	EVAVIH	200
1342	EVEDEP	113
1343	EVEHET	100
1344	EVIBUH	298
1345	EVIDUI	293
1346	EVIFAQ	293
1347	EVIFOE	293
1348	EVIGOG	180
1349	EVIHEW	293
1350	EVIJOJ	293
1351	EVIJUP	293
1352	EVIJUP01	293
1353	EVIKOJ	293
1354	EVIKOK	295
1355	EVIVUB	100
1356	EVIXIQ	295
1357	EVODID	120
1358	EVODOI	295
1359	EVOLUX	298
1360	EVOPEL	293
1361	EVORIR	298
1362	EVOWER	150
1363	EVUMIS	100
1364	EWAJER	100
1365	EWAMIZ	150
1366	EWAPUO	150
1367	EWAQEZ	150
1368	EWIGIA	293
1369	EWODAW	100
1370	EWOZAR	293
1371	EWUBON	293
1372	EWUCUU	298
1373	EWUPIW	293
1374	EXAFEO	293
1375	EXAHEQ	293
1376	EXAXAC	293
1377	EXAXIK	263
1378	EXEKAU	293
1379	EXESOQ	293
1380	EXIJEB	100
1381	EXIMAA	100
1382	EXIVUD	113
1383	EXIZOB	298
1384	EXORUF	293
1385	EXOSAM	291
1386	EXPORD10	295
1387	EXUREU	293
1388	EYASUS	293
1389	EYENOM	123
1390	EYIFEY	294
1391	EYIRAF	293
1392	EYODOL	120
1393	EYOHUV	295
1394	EYOSUG	295
1395	EYOZUN	126
1396	EYUPAP	295
1397	EZARUS	100
1398	EZECUH	193
1399	EZESOR	293
1400	EZEYOX	295
1401	EZIDIB	298
1402	EZIFEZ	100
1403	EZIPOT	296
1404	EZIYES	150
1405	EZOBUQ	293
1406	EZOHEH	293
1407	EZOJEJ	298
1408	EZOMOV	143
1409	EZOMUB	143
1410	EZONAJ	298
1411	EZONUD	223
1412	EZOZAU	173
1413	EZOZEY	143
1414	EZUJUF	291
1415	EZUKUG	295
1416	FABCOA	295
1417	FABTOT	295
1418	FACBOA10	295
1419	FACCIV10	295
1420	FACCOD	100
1421	FACTEJ	293
1422	FACVAH	296
1423	FADDIY	203
1424	FADQAD	143
1425	FADREI	150
1426	FADZOA	293
1427	FAFNAD	295
1428	FAFNUX	120
1429	FAFPEJ	298
1430	FAFQOU	150
1431	FAGFEZ	293
1432	FAGQOT	295
1433	FAGVEQ	293
1434	FAHTUD	295
1435	FAJHAZ	295
1436	FAJJIJ	295
1437	FAJKUW	170
1438	FAJSOY	295
1439	FAJVOB	295
1440	FALBEZ	295
1441	FALBEZ01	295
1442	FALCIG	110
1443	FALDAZ	100
1444	FALLIO	150
1445	FALSEQ	193
1446	FALVAQ	100
1447	FALXAR	295
1448	FALZUO	293
1449	FANJIN	295
1450	FANNAK	123
1451	FAQDEG	295
1452	FAQDIK	295
1453	FAQKEN	173
1454	FAQLUE	113
1455	FAQPOE	223
1456	FAQYEC	173
1457	FARHUC	120
1458	FASRAU	150
1459	FASVOM	273
1460	FATFEN	296
1461	FATNIX	295
1462	FATVAZ	295
1463	FATVED	295
1464	FATYOO	295
1465	FATZEH	296
1466	FAVRIF	100
1467	FAWYEI	173
1468	FAXMOG	295
1469	FAXMUM	295
1470	FAXSOM	295
1471	FAXYAG	100
1472	FAYFIV	273
1473	FAYWOT	100
1474	FAZRED	295
1475	FAZWAG	100
1476	FAZWUZ	173
1477	FEBROV	173
1478	FECWIT	295
1479	FEDBAS	293
1480	FEDBEW	150
1481	FEDNEI	293
1482	FEDXIV	295
1483	FEFBEX01	295
1484	FEFKEI	100
1485	FEFLAF	150
1486	FEFLOS	100
1487	FEFMAG	120
1488	FEFNOT02	120
1489	FEFNOT03	120
1490	FEFNOT04	295
1491	FEFQIS	150
1492	FEFYEW	190
1493	FEFYUM	299
1494	FEGPIQ	295
1495	FEGROA	100
1496	FEHNOW	293
1497	FEHXUM	294
1498	FEJGIL	293
1499	FEJNEN	183
1500	FEJWEX	301
1501	FEJWIC	296
1502	FELGUY	295
1503	FELGUY01	295
1504	FEMMOZ	295
1505	FENNOB	295
1506	FENQUM	123
1507	FENZIJ	90
1508	FEPFOX	180
1509	FEPTIF	293
1510	FEPTUP	163
1511	FEQNUM	100
1512	FEQYUX	163
1513	FERLUL	100
1514	FERPIB	173
1515	FESYIM01	298
1516	FETFOA	173
1517	FETROL	295
1518	FETTII	298
1519	FETWUW	105
1520	FEXGUL	120
1521	FEXXIP	133
1522	FEYMOM	289
1523	FEYYUE	294
1524	FEYZAL	291
1525	FEZBER	295
1526	FEZHAV	293
1527	FIBZUL10	295
1528	FICGED	295
1529	FICGED10	295
1530	FICZAU	298
1531	FIDCUR	295
1532	FIDWAQ	295
1533	FIFXAT	295
1534	FIGSIX	295
1535	FIHXID	295
1536	FIKGAI	293
1537	FIKWUT	130
1538	FILBEH01	293
1539	FILZAD	293
1540	FIMQEY	293
1541	FINWEE	295
1542	FINWEE10	295
1543	FIPKAQ	295
1544	FIQDUF	293
1545	FIRXOU	173
1546	FISDAN	180
1547	FISKIC	293
1548	FISWIN	295
1549	FISWIN01	208
1550	FISYEL	295
1551	FIVTAF	123
1552	FIWRIM	295
1553	FIWYAL	295
1554	FIWZUG	295
1555	FIWZUG01	294
1556	FIWZUG02	293
1557	FIWZUG03	120
1558	FIXBEU	293
1559	FIXBIY	293
1560	FIXHOJ	295
1561	FIXKEC	295
1562	FIXKOM	295
1563	FIXLEE	289
1564	FIXNIJ	295
1565	FIZMEH	298
1566	FIZPEK	100
1567	FIZPIN	295
1568	FMPROA	295
1569	FOBJUB01	295
1570	FOBLUE	105
1571	FOBMIT	120
1572	FOBXAW	105
1573	FOBYIF	293
1574	FOCBEF	296
1575	FOCBIJ	300
1576	FOCFAF	293
1577	FODSOG	295
1578	FOFCAF	291
1579	FOFCEJ	293
1580	FOGTOL	298
1581	FOGWAZ	295
1582	FOHBIO	190
1583	FOHHEP	295
1584	FOHPEX	108
1585	FOKJUK	295
1586	FOKJUK10	295
1587	FOLWIN	120
1588	FOMPUS	295
1589	FOMZIR	150
1590	FONHEW	298
1591	FONXOW	294
1592	FONYUC	295
1593	FOQGUO	293
1594	FOQPOR	153
1595	FORMYC	295
1596	FOSMIJ	295
1597	FOSPUZ	293
1598	FOTZIY	120
1599	FOVHON	295
1600	FOVLIM	110
1601	FOVRIS	291
1602	FOVROY	295
1603	FOVWIX	296
1604	FOVYIZ	295
1605	FOWNUB	173
1606	FOWTOB	223
1607	FOWVAP	294
1608	FOWWEU	183
1609	FOWYEW	296
1610	FOXWOE	295
1611	FOYLIP	100
1612	FOYTOC	295
1613	FOYTUI	295
1614	FOYTUJ	223
1615	FOYVAQ	295
1616	FOYWAR	295
1617	FOZDAZ10	295
1618	FOZDIH01	110
1619	FOZWEX	100
1620	FUCKOD	295
1621	FUCKOD01	293
1622	FUCVUU	295
1623	FUCWIJ	295
1624	FUDZOT	295
1625	FUFDIT	295
1626	FUFLEX	295
1627	FUFQUS	100
1628	FUGTOQ	295
1629	FUGTOQ01	120
1630	FUGVOS	295
1631	FUGXIO	100
1632	FUGXUB	298
1633	FUHCER	121
1634	FUHHAS	110
1635	FUHPUU	100
1636	FUJDET	295
1637	FUJHEY	100
1638	FUJWAI01	130
1639	FUJWEM	295
1640	FUJZUF	295
1641	FULGEY	295
1642	FULPAE	223
1643	FUPRIR	295
1644	FUPTAM	296
1645	FUQKUX	295
1646	FUQXEV	293
1647	FURCAW	295
1648	FURFON	295
1649	FUSFEF	120
1650	FUSFOP	120
1651	FUSVAQ	295
1652	FUSVAQ01	105
1653	FUTCOM	295
1654	FUWGOU	93
1655	FUWKOY	291
1656	FUXKAL	110
1657	FUXKEP	110
1658	FUXXAX	295
1659	FUXYOM	295
1660	FUYCEH	295
1661	FUYJOZ	100
1662	FUZNIY	296
1663	FUZQIB	293
1664	FUZYEF	291
1665	GABFOE	123
1666	GABGOH	193
1667	GABWUC	100
1668	GABXEN	293
1669	GADHAV	293
1670	GADJAX	291
1671	GADLUU	293
1672	GADRIN	293
1673	GADROT	293
1674	GADXAL	293
1675	GAFDEX	293
1676	GAFDIB	293
1677	GAFSEL	295
1678	GAFTOW	295
1679	GAFVIS	295
1680	GAFVOY	295
1681	GAGZOF	100
1682	GAHBIB	193
1683	GAHFUS	100
1684	GAHJUU	295
1685	GAHNEI	295
1686	GAKGIK	135
1687	GAKREP	295
1688	GAKSAM	295
1689	GAKZEY	100
1690	GAKZIC	100
1691	GALBIE	295
1692	GALBOL	273
1693	GALBUR	273
1694	GALDIH	293
1695	GALMAI	188
1696	GAMWIB	173
1697	GANBIG	295
1698	GANFUY	293
1699	GANGAF	293
1700	GANJAG	122
1701	GANWIB	203
1702	GANYID	190
1703	GAPFEK	296
1704	GAPVEY	295
1705	GAPVUO	295
1706	GAQCOS	173
1707	GAQJOZ	291
1708	GAQLER	293
1709	GAQTAV	293
1710	GARDEK	296
1711	GARGEN	296
1712	GARJAL	295
1713	GARPUK	295
1714	GASMUJ	100
1715	GASNIY	298
1716	GASNIY01	120
1717	GATPOI	153
1718	GATVED	298
1719	GATZUY	293
1720	GAVMUM	295
1721	GAVRUR	293
1722	GAVWUW	294
1723	GAWCIQ	295
1724	GAWKUL	296
1725	GAWLEW	295
1726	GAWPEZ	295
1727	GAXJOE	295
1728	GAXTII	295
1729	GAYDIT	295
1730	GAZGOF	293
1731	GAZQOP	298
1732	GAZVEK	173
1733	GAZVIO	173
1734	GEBCOH	100
1735	GEBPAE	295
1736	GEBXUI	123
1737	GEDPIQ	120
1738	GEFFAA	296
1739	GEFTAO	293
1740	GEFXOG	130
1741	GEGBIF	150
1742	GEGDIG	150
1743	GEGGOO	295
1744	GEGGUU	295
1745	GEGKIN	153
1746	GEGRAN	180
1747	GEGWIY	295
1748	GEGZIC	210
1749	GEHBIE	295
1750	GEHBIE01	295
1751	GEHBOK	295
1752	GEHDAY	295
1753	GEHYAU	120
1754	GEJBAZ	299
1755	GEJCAA	293
1756	GEJFOR	120
1757	GEJLEO	100
1758	GEJYAW	293
1759	GEKJOW	100
1760	GEKRUK	293
1761	GEKSAR	298
1762	GEKYOK	295
1763	GELQUL	240
1764	GELRUL	294
1765	GEMDOR	295
1766	GEMQUK	295
1767	GEMWAX	120
1768	GEMYUT	120
1769	GENWOL	143
1770	GENXUU	295
1771	GEPBUY	93
1772	GEPJIW	110
1773	GEPPAT	293
1774	GEPRUQ	110
1775	GEPSAX	110
1776	GEPSEB	110
1777	GERCUB	295
1778	GERNEX	293
1779	GERVUW	100
1780	GERYOT	296
1781	GESBOV	295
1782	GESBUD	150
1783	GESCEO	150
1784	GESCIS	150
1785	GESCOY	150
1786	GESHIW01	298
1787	GESKUK	295
1788	GEVBIT	294
1789	GEVJOH	296
1790	GEWWAG	295
1791	GEXGUL	295
1792	GEXZOA	100
1793	GICHOP	295
1794	GICMOU	295
1795	GICXOF	295
1796	GIDHUX	293
1797	GIDLIP	150
1798	GIDPUF	296
1799	GIDQIU	296
1800	GIDZIC10	295
1801	GIFZAW01	295
1802	GIGQIX	293
1803	GIGVUN	295
1804	GIGZOL	295
1805	GIHHIP	296
1806	GIHJOX	294
1807	GIHTEW	295
1808	GIJHOX	93
1809	GIKHOX	295
1810	GILJOB	223
1811	GILLIY	296
1812	GILLUK	296
1813	GIMDIQ	273
1814	GIMHIU	294
1815	GINNAT	298
1816	GIPJIA	100
1817	GIPJUM	296
1818	GIRFIX	293
1819	GIRQUT	295
1820	GIRTEH	293
1821	GIRXOV	295
1822	GISPEE	100
1823	GISPEE01	293
1824	GISROQ	293
1825	GISTIM	294
1826	GISVUZ	295
1827	GITGUM	293
1828	GITNUT	120
1829	GIVREJ	293
1830	GIVRIN	100
1831	GIVXUF	150
1832	GIWXAL	120
1833	GIWXAL01	173
1834	GIXDEW	223
1835	GIXDOG	243
1836	GIXDUM	123
1837	GIXFID	173
1838	GIXLII	295
1839	GIYJAA	173
1840	GIZFEB	296
1841	GLAMMP	295
1842	GLCTSM	295
1843	GLPHEA20	295
1844	GLSARM	295
1845	GLTLYR10	295
1846	GLTRDH01	295
1847	GLUCMH11	295
1848	GLYTMS	295
1849	GLYTRE02	295
1850	GLYTRE03	110
1851	GMOCPY	295
1852	GOBSOG	100
1853	GOCPUJ	295
1854	GOCTOI	293
1855	GOCZEE	296
1856	GOGYEG	295
1857	GOJBUC	295
1858	GOJCOX	295
1859	GOJPUQ	295
1860	GOKDAM	293
1861	GOKFES	293
1862	GOKFOC	173
1863	GOKQAY	295
1864	GOLWOT	295
1865	GOLXAG	295
1866	GOLZIQ	295
1867	GOMDAO	298
1868	GOMGIY	295
1869	GOMRIJ	295
1870	GONCIV	188
1871	GONCOB	295
1872	GOQNIJ	295
1873	GORFIC	140
1874	GOSTOX	213
1875	GOUGER10	295
1876	GOWWIY	295
1877	GOWXOF	180
1878	GOYCAY	150
1879	GOYZID	183
1880	GOZLUC	295
1881	GUANPH	295
1882	GUANSH10	295
1883	GUBDIQ	295
1884	GUBJET	296
1885	GUCZUZ	295
1886	GUDNIC	295
1887	GUDPIF	298
1888	GUDWOR	295
1889	GUHFUL	273
1890	GUHHAT	293
1891	GUHMAY	223
1892	GUHMEC	223
1893	GUHRAC	295
1894	GUHRIK	173
1895	GUHROQ	173
1896	GUHROQ01	110
1897	GUJREI	295
1898	GUKTIP	295
1899	GUKYAM	150
1900	GULCEW	293
1901	GULYES	110
1902	GULYES01	110
1903	GUNPEL	150
1904	GUNQUB	203
1905	GUQLAG	100
1906	GUQSER	293
1907	GURFOO	173
1908	GURXPX10	80
1909	GUSRUH	173
1910	GUSYID	293
1911	GUTMOX	293
1912	GUVACO	295
1913	GUVFIM	296
1914	GUVFOS	296
1915	GUXFOU	296
1916	GUXFUA	203
1917	GUXREX	294
1918	GUYTAV	298
1919	GUYTEZ	298
1920	GUYTID	298
1921	GUYTOJ	298
1922	GUYTUP	298
1923	GUYVAY	150
1924	HABMUS	295
1925	HABTOT	295
1926	HABTUB	293
1927	HABWUE	298
1928	HABXEO	293
1929	HACTAG	295
1930	HADJAY	273
1931	HADJUS	293
1932	HADQAE	295
1933	HADVIT	100
1934	HADVOZ	100
1935	HAFDIC	293
1936	HAFLEH	110
1937	HAGDUP	213
1938	HAGQAJ	293
1939	HAGWET	293
1940	HAHBOI	293
1941	HAHDEZ	193
1942	HAHHED	295
1943	HAHJAB	295
1944	HAHXUJ	295
1945	HAJFOP	296
1946	HAKBOL	293
1947	HAKWUN	120
1948	HALNEP	173
1949	HAMBEE	296
1950	HAMXAV	298
1951	HAMXAV01	293
1952	HAMYOL	273
1953	HANDEG	293
1954	HANJUD	100
1955	HANNUF	295
1956	HANSTO	295
1957	HAPIOX	295
1958	HAPLIV	100
1959	HARQIC	100
1960	HASDAG	173
1961	HASKUJ	293
1962	HASVOO	143
1963	HATWOO	295
1964	HAVKOE	295
1965	HAXBUD	295
1966	HAXBUD01	295
1967	HAXGUJ	213
1968	HAXQAA	295
1969	HAXREE	297
1970	HAXTAD	296
1971	HAXWUA	130
1972	HAYPON	295
1973	HAYTOS	293
1974	HAYYIQ	130
1975	HAZQUV	173
1976	HAZRAC	293
1977	HEBHUR	295
1978	HEBJAA	150
1979	HECCAT	295
1980	HECJUU	295
1981	HECNAE	295
1982	HECNIM	223
1983	HEDMEJ	294
1984	HEFMOU	240
1985	HEGDAZ	113
1986	HEGDIH	298
1987	HEGFUV	293
1988	HEGKUB	290
1989	HEGNOY	100
1990	HEGRIW	180
1991	HEGXOG	295
1992	HEHMEO	93
1993	HEHTAR	120
1994	HEJGAG	123
1995	HEKPIW01	295
1996	HEKSIZ	295
1997	HEKSOF	295
1998	HEKTEW	295
1999	HEKWOL	100
[truncated: 4,160 more rows]
